# Supplementary material for: Facile preparation of polyvinyl alcohol coated SiO2 stationary phases for high performance liquid chromatography
Source: Royal Society of Chemistry journal article supplement (doi:10.1039/c4an01021c), 2014-01-01
Supplement: c4an01021c1.pdf [file c4an01021c1.pdf]

## Electronic Supplementary Information

### Facile preparation of polyvinyl alcohol coated SiO<sub>2</sub> stationary phases for high performance liquid chromatography

Shunli Ji, Feifang Zhang\*, Shengjie Wu, Bingcheng Yang\* and Xinmiao Liang<sup>a,b</sup>

<sup>a</sup>School of Pharmacy, East China University of Science and Technology, Shanghai 200237, China

<sup>b</sup>Dalian Institute of Chemical Physics, Chinese Academy of Sciences, Dalian 116023, China

#### Correspondence:

Dr. Bingcheng Yang

School of Pharmacy, East China University of Science and Technology, Shanghai

200237, China

**Email:** [bcyang@ecust.edu.cn](mailto:bcyang@ecust.edu.cn)

**Fax:** 0086-21-64250622

---

\* 130 Meilong RD, Pharmacy School, East-China Univ. Sci. Tech., Shanghai 200237 (P. R. China). Fax, +86-21-64250622; Email, [zhangff@ecust.edu.cn](mailto:zhangff@ecust.edu.cn) (F. Zhang); [bcyang@ecust.edu.cn](mailto:bcyang@ecust.edu.cn) (B. Yang).

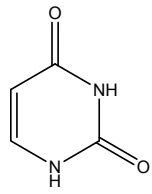

uracil

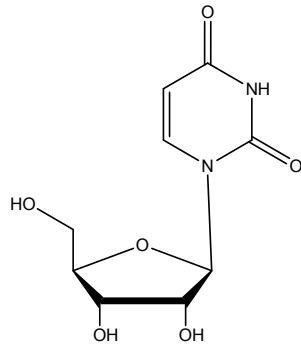

uridine

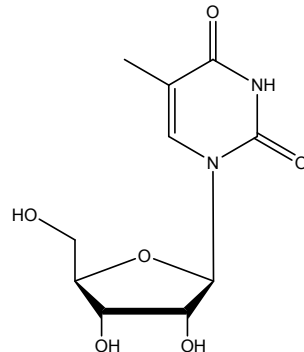

5-methyl uridine

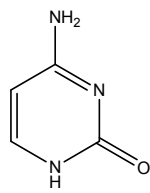

cytosine

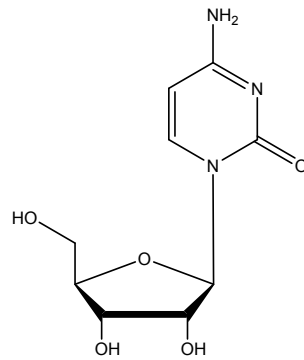

cytidine

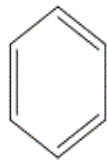

benzene

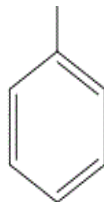

toluene

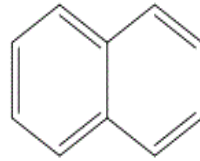

naphthalene

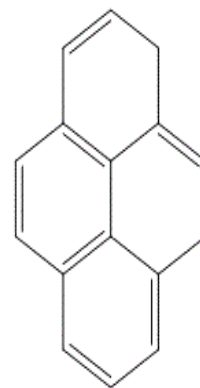

pyrene

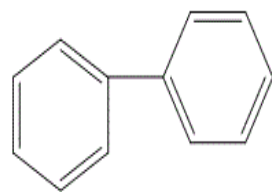

biphenyl

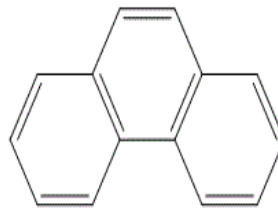

phenanthrene

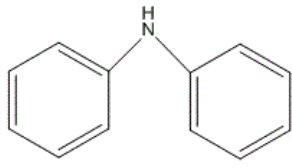

diphenylamine

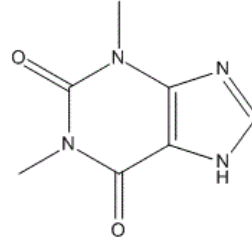

theophylline

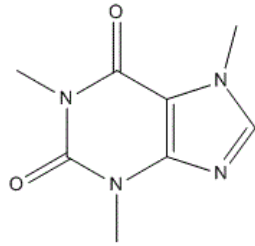

caffeine

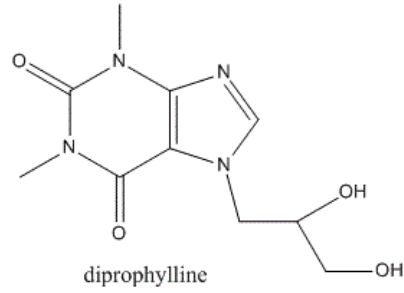

diprophylline

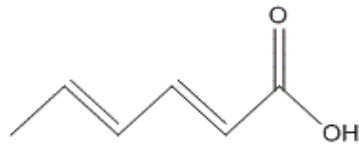

sorbic acid

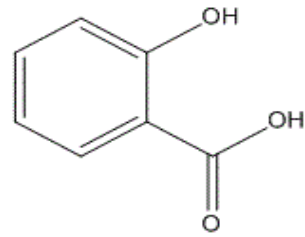

salicylic acid

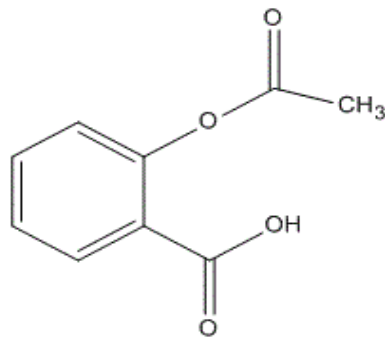

acetyl salicylic acid

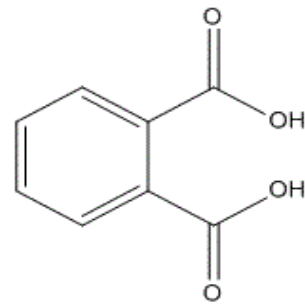

phthalic acid

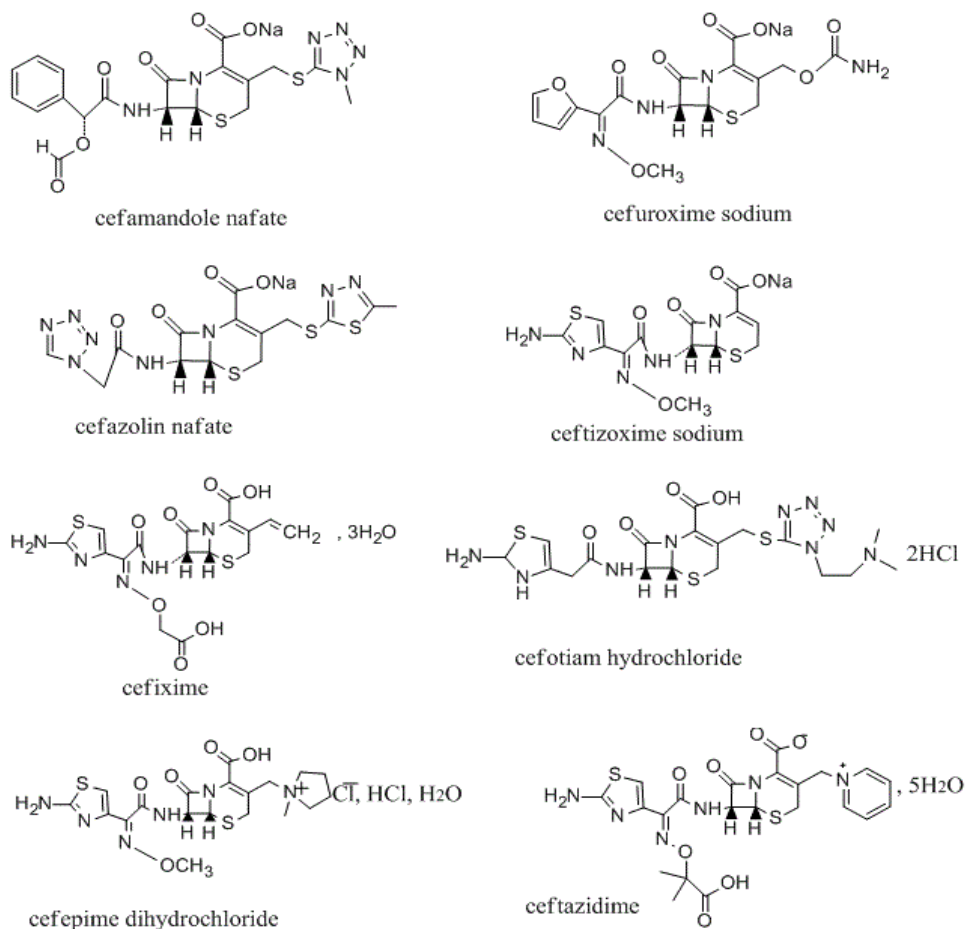

**Scheme-1** Chemical structures of the analytes used for evaluation

**SI-Table 1. Summary of characterization data of the PVA-Sil and bare silica**

| Material | BET Surface Area<br>(m <sup>2</sup> /g) | Pore Volume<br>(cm <sup>3</sup> /g) | C%    |
|----------|-----------------------------------------|-------------------------------------|-------|
| Silica   | 360.89                                  | 0.87                                | <0.3% |
| PVA-Sil  | 289.15                                  | 0.78                                | 2.47% |

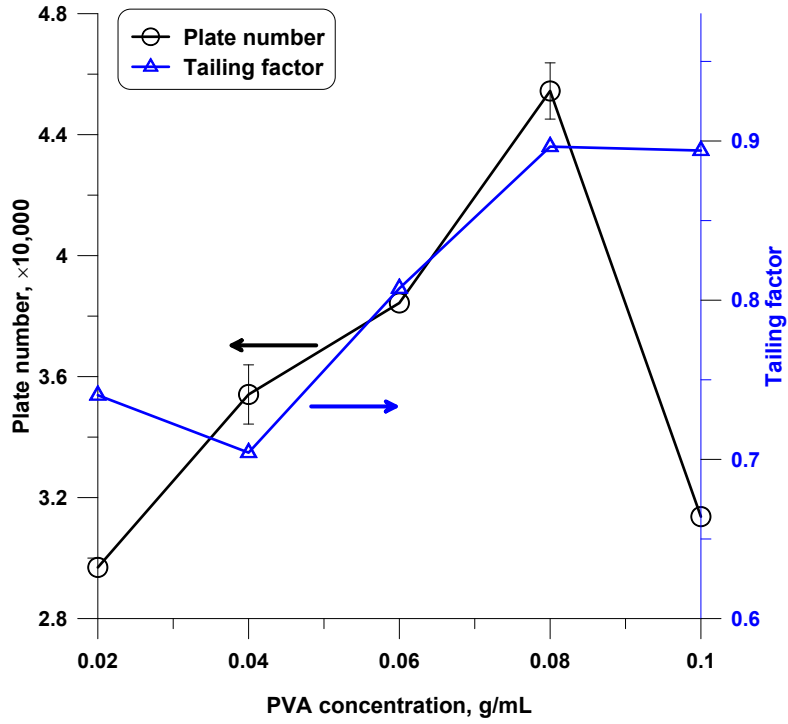

**SI-Fig. 1** Effect of PVA solution concentration on the chromatographic performance.

Conditions: mobile phase: A: ACN; B: H<sub>2</sub>O; C: H<sub>2</sub>O (250 mM NH<sub>4</sub>FA, pH, 5.7), isocratic mode, 75%A/19% B/6% C; detection wavelength, 254 nm; flow rate, 1.0 mL/min; injection volume, 10 μL; column temperature, 30 °C; model analyte, cytosine.

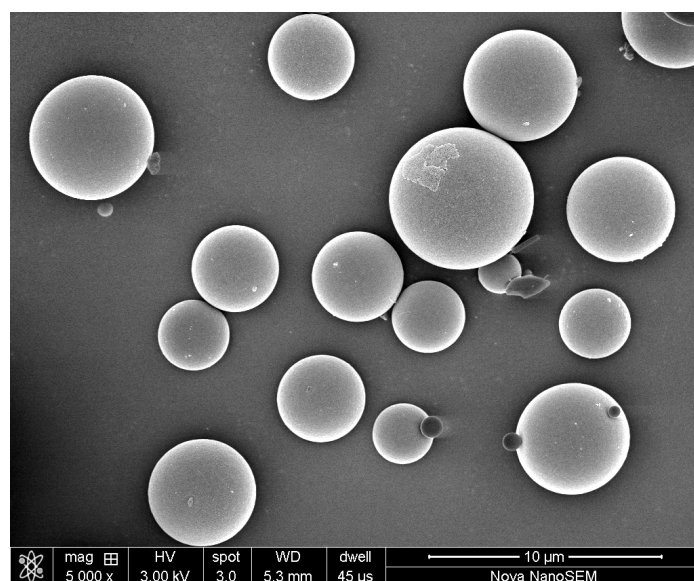

SI-Fig. 2 Scanning electron micrographs of PVA-Sil.

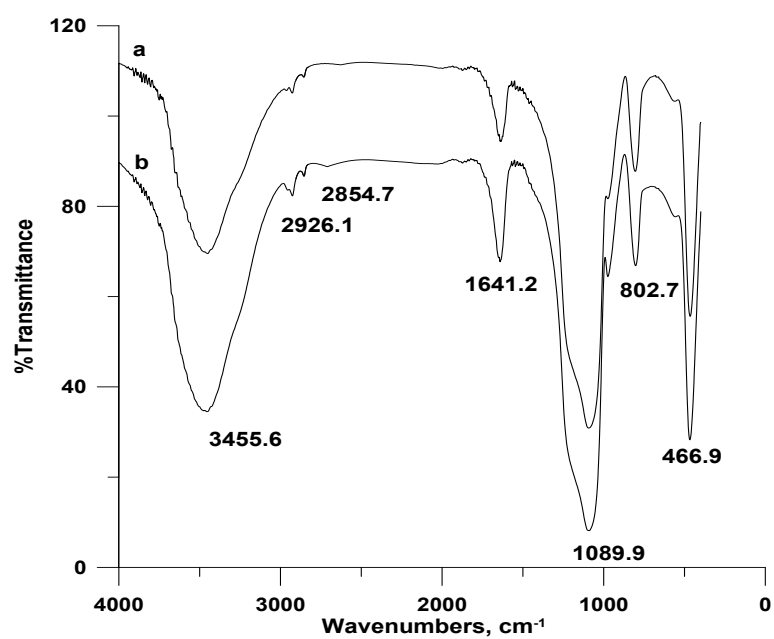

SI-Fig.3 IR spectra of bare silica (a) and PVA-sil (b).

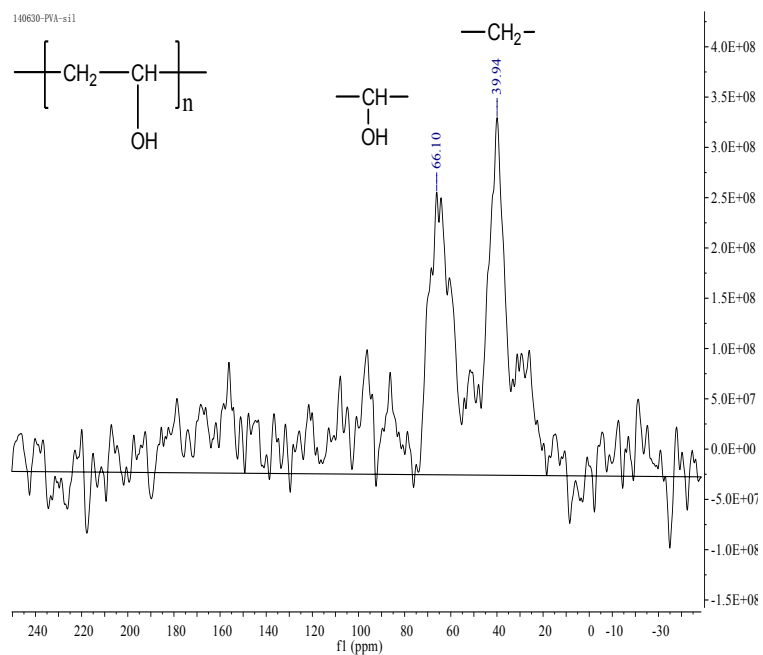

**SI-Fig. 4** Solid phase  $^{13}\text{C}$ -CP/MAS NMR spectrum of PVA-Sil stationary phase

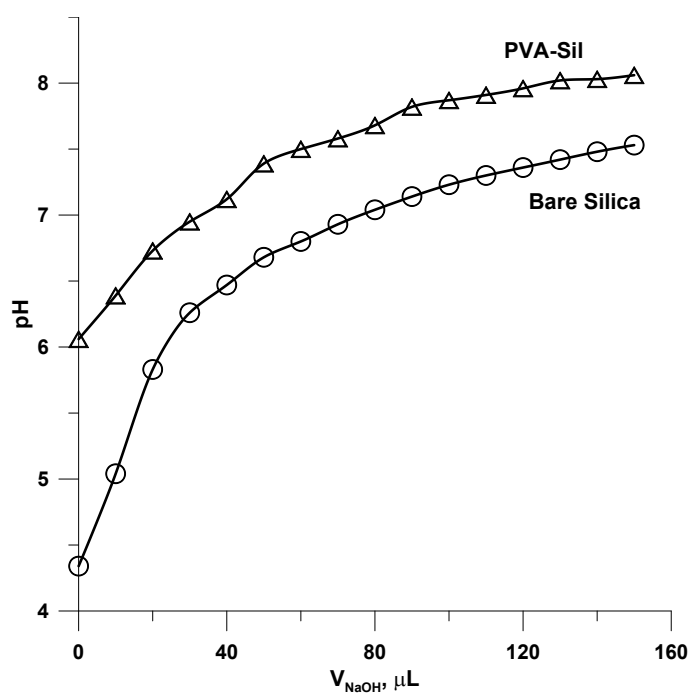

**SI-Fig.5** Titration curve of bare silica and PVA-Sil.

Titration procedure: 0.3 g of silica or PVA-Sil was dissolved in 3 mL of pure water; the suspensions were titrated with addition of 10  $\mu\text{L}$  standard NaOH solution (0.1 M) each time. Then the suspensions were shaken and measured by a pH meter.

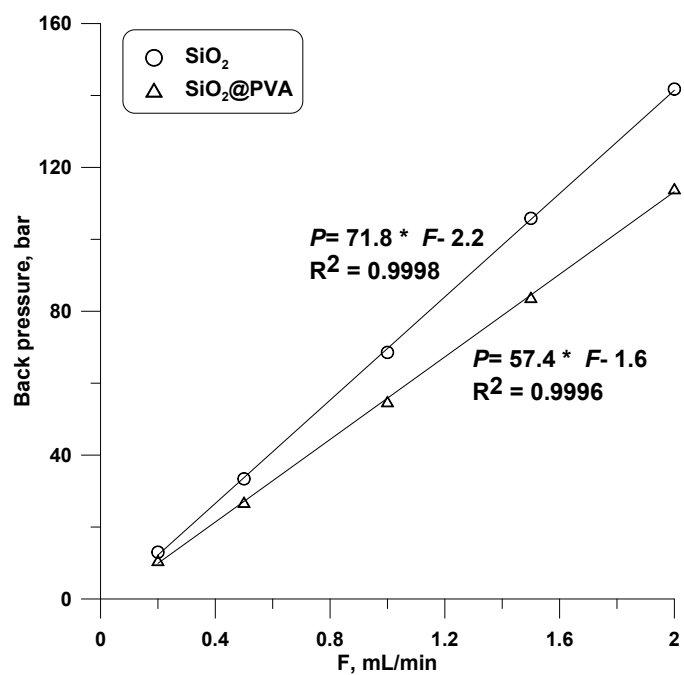

SI-Fig.6 Plot of back pressure vs linear velocity of mobile phase.

Conditions: mobile phase, pure water.

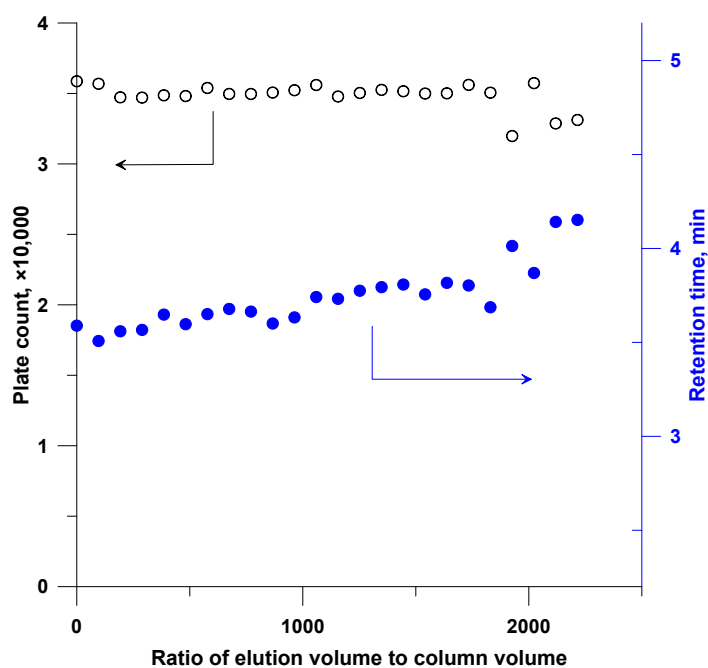

SI-Fig.7 Stability test of PVA-Sil column at extreme pH value (pH 11).

Conditions: mobile phase: ACN/triethylamine (v/v=90/10).



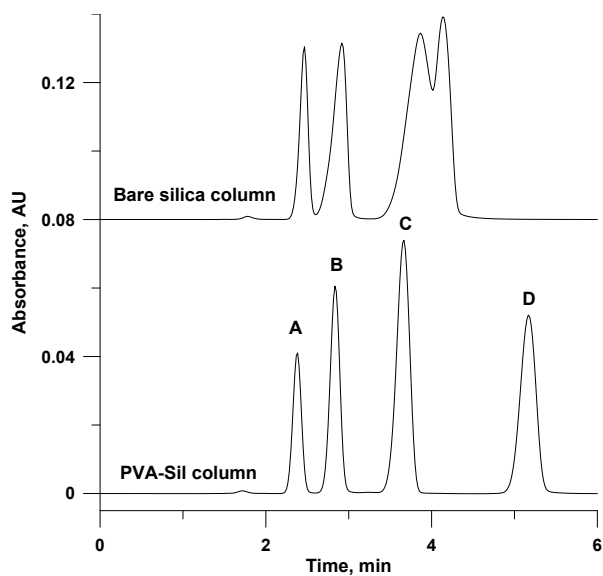

**SI-Fig.8** Separation of small molecular acids on bare silica and PVA-Sil.

Conditions: mobile phase: A: ACN; B: H<sub>2</sub>O; C: H<sub>2</sub>O (250 mM NH<sub>4</sub>FA, pH, 3.15). 90% A/4% B/6% C; other conditions same to Fig. 3. Peak identification: A, sorbic acid, B, salicylic acid, C, acetyl salicylic acid, D, phthalic acid.

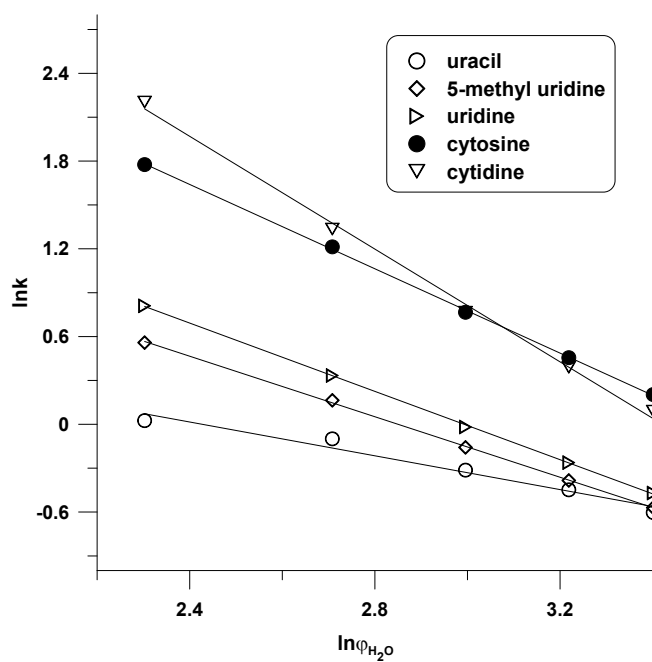

**SI-Fig. 9** Plots of  $\ln k$  & logarithm of the volume fraction of water in the mobile phase.

Conditions same to Fig. 3.

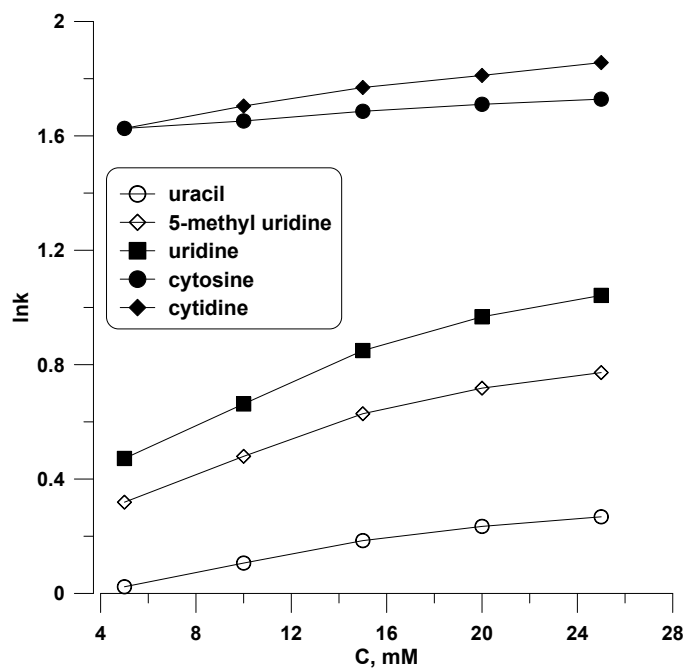

**SI-Fig.10** Effect of salt concentration in the mobile phase on retention.

Conditions same to Fig. 4.

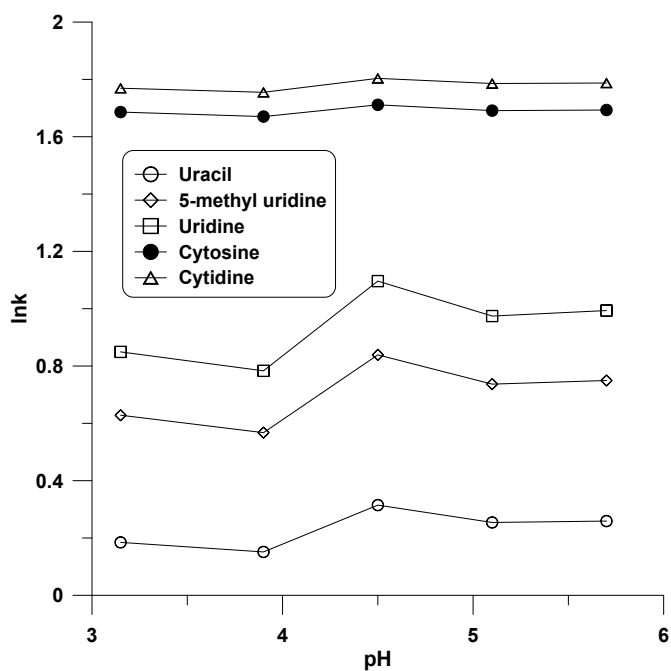

**SI-Fig. 11** Effect of pH value of the mobile phase on retention.

Chromatographic conditions: mobile phase with pH value varying from 3.1 to 5.7 and

other conditions same to Fig.4.

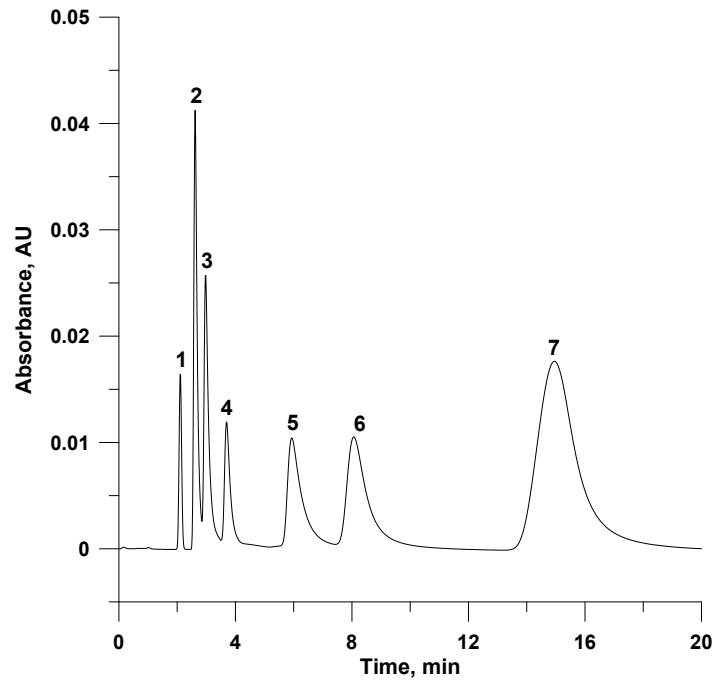

**SI-Fig. 12** Separation of polycyclic aromatic hydrocarbons on PVA-SDS column.

Conditions: column size, 4.6 mm i.d. × 150 mm length, 5 μm dia.; mobile phase, MeOH/ H<sub>2</sub>O (v/v=20/80); flow rate, 1 mL/min; column temperature, 30 °C; injection volume, 10 μL; detection wavelength, 254 nm; peak identification, 1, uracil; 2, benzene; 3, toluene; 4, naphthalene; 5, biphenyl; 6, phenanthrene; 7, pyrene.

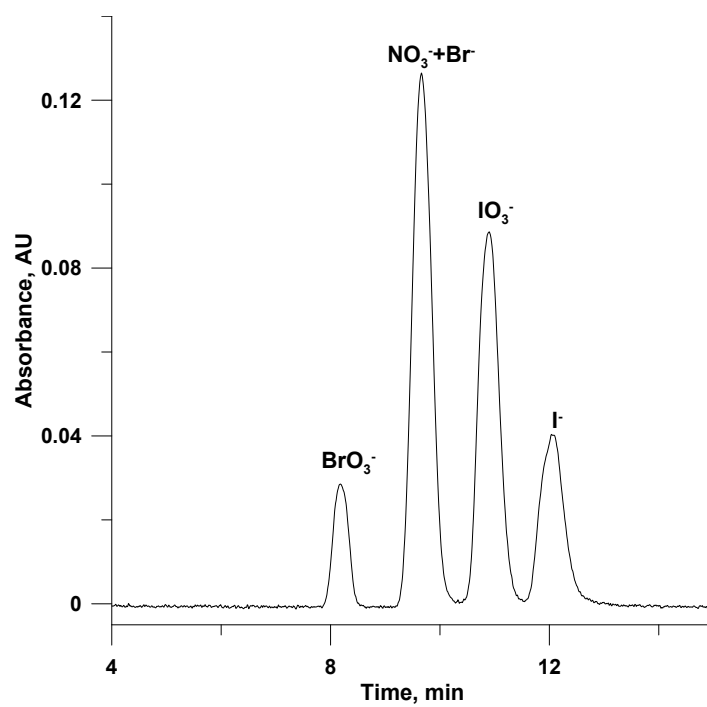

**SI-Fig. 13** Separation of inorganic anions on PVA-PEI column

Conditions: column size, 4.6 mm i.d.× 150 mm length, 5  $\mu\text{m}$  dia.; mobile phase, 2 mM NaCl; flow rate, 1 mL/min; column temperature, 30 °C; injection volume, 10  $\mu\text{L}$ ; detection wavelength, 210 nm.
